# Supplementary material
Source: PubMed Central journal article supplement (PMC11193647)
Supplement: NIHMS1960159-supplement-Supplementary_Figure_1.pdf [file NIHMS1960159-supplement-Supplementary_Figure_1.pdf]

We are interested in the way people think when they are experiencing unpleasant or painful throat symptoms. Below is a list of common thoughts, beliefs, and attitudes associated with having throat symptoms which can include voice change, burning/soreness/irritation in the throat, sensation of excess mucus in the throat, throat clearing, cough, or feeling of a lump in the throat, among others. Please rate, using the following scale, the degree to which you agree with each of the following statements, based on your experience with throat symptoms over the past month.

***15 questions are assessed for a response. After the participant gives his/her answer for each question, research assistant asks them each of the following questions:***

1. How did you come up with that answer?
2. In your own words could you tell me what this question is asking?
3. What do you think of how the question was asked? Probes: Confusing / Clear / Too Long
4. What time frame did you consider when completing this item?
5. What strategies did you use to think about the best answer for this time frame? For example, did you recall each event individually or use some type of strategy to estimate it?
6. Does this question need any changes to make it easier to understand? If yes, what changes do you recommend?

***After all questionnaire items have been assessed, research participant will be told: This concludes the questionnaire. Thank you for taking the time to go over each item. Your input is very valued.***

1. In your opinion, were there any items that you feel were not asked or not assessed in enough detail? In other words, what did you feel was left out of our questionnaire?
2. What topics would you like to see added?
3. Were there any topics that were asked in too much detail or that you felt were not necessary?
